# Supplementary material
Source: PubMed Central journal article supplement (PMC3804010)
Supplement: NIHMS500822-supplement-Further_Information_on_Constructs.pdf [file NIHMS500822-supplement-Further_Information_on_Constructs.pdf]

**a** Basic parts

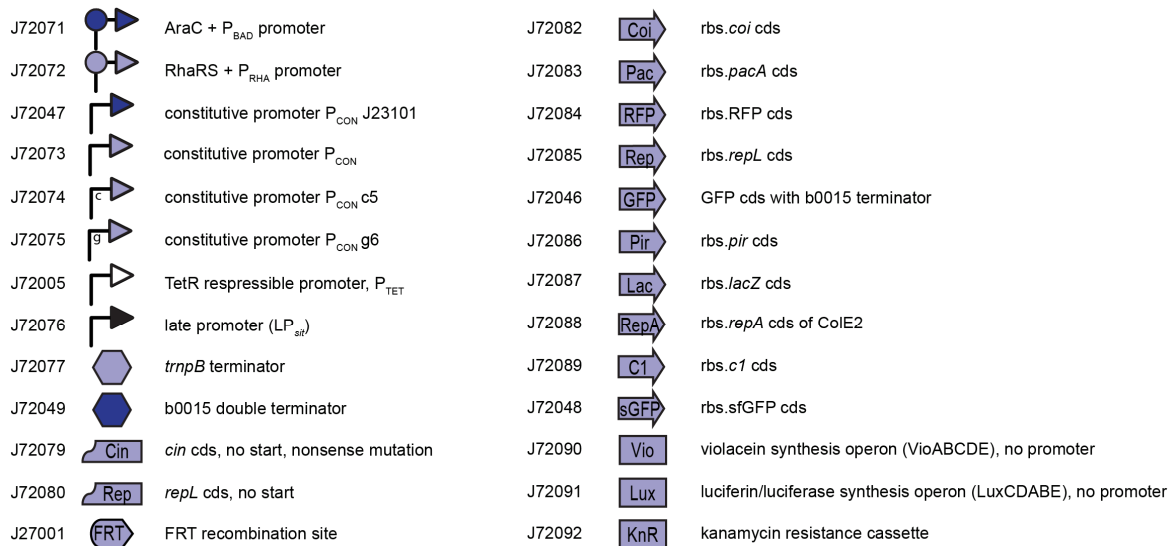

**b** Composite parts

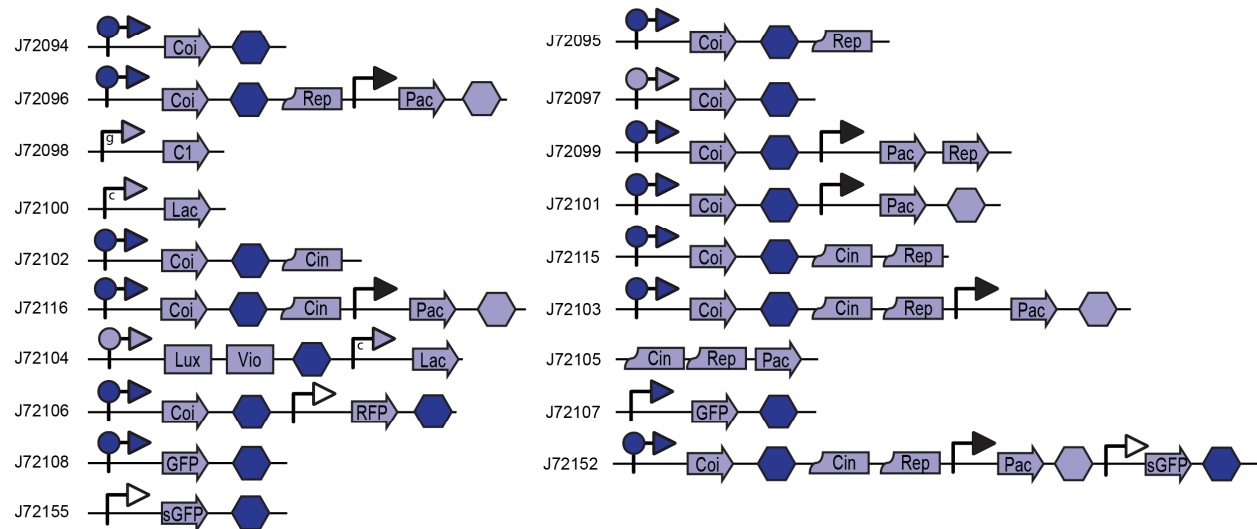

**c** Strains

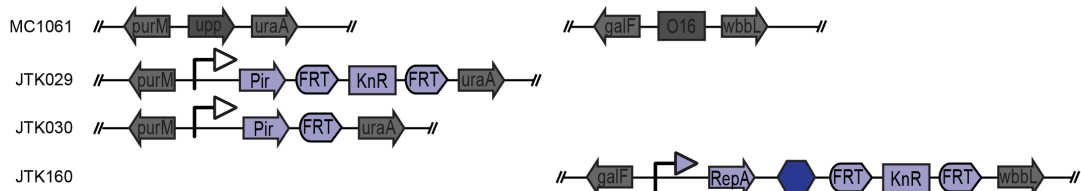

**Figure S1 - Illustration of parts and strains used in the study**

Sequences for the basic parts, composite parts, vectors, and strains are listed in tables S1-S4, and sequences are available in the Registry of Standard Biological Parts (<http://partsregistry.org>).

**Table S1 – Basic Parts used in the study**

| Registry # | Description                       | Description/Source                                                                                                                                                                                                                       |
|------------|-----------------------------------|------------------------------------------------------------------------------------------------------------------------------------------------------------------------------------------------------------------------------------------|
| bba_J72071 | <i>araC</i> -P <sub>BAD</sub>     | Arabinose responsive regulator and corresponding promoter from <i>E. Coli</i> (30)                                                                                                                                                       |
| bba_J72072 | <i>rhaRS</i> -P <sub>RHA</sub>    | Rhamnose responsive regulators and corresponding promoter from <i>E. Coli</i> (31)                                                                                                                                                       |
| bba_J72047 | P <sub>CON</sub> J23101           | BglBrick standard version of Bba_J23101, synthetic constitutive promoter (see <a href="http://partsregistry.org/wiki/index.php?title=Part:BBa_J23101">http://partsregistry.org/wiki/index.php?title=Part:BBa_J23101</a> )                |
| bba_J72073 | P <sub>CON</sub>                  | Synthetic constitutive promoter                                                                                                                                                                                                          |
| bba_J72074 | P <sub>CON</sub> -c5              | Synthetic constitutive promoter                                                                                                                                                                                                          |
| bba_J72075 | P <sub>CON</sub> -g6              | Synthetic constitutive promoter                                                                                                                                                                                                          |
| bba_J72005 | P <sub>TET</sub>                  | BglBrick standard version of BBa_R0040, TetR repressible promoter (see <a href="http://partsregistry.org/Part:BBa_R0040">http://partsregistry.org/Part:BBa_R0040</a> )                                                                   |
| bba_J72076 | LP <sub>lit</sub>                 | Late promoter, Bacteriophage P1 (6)                                                                                                                                                                                                      |
| bba_J72077 | <i>trnpB</i> terminator           | Terminator from <i>E. coli</i> DH1                                                                                                                                                                                                       |
| bba_J72049 | double terminator                 | Tandem terminators; BglBrick standard version of Bba_B0015 (see <a href="http://partsregistry.org/Part:BBa_B0015">http://partsregistry.org/Part:BBa_B0015</a> )                                                                          |
| bba_J72079 | <i>cin</i> , no start, frameshift | Derived from Bacteriophage P1 (6)                                                                                                                                                                                                        |
| bba_J72080 | <i>repL</i> , no start            | Lytic replication origin, Bacteriophage P1 (6)                                                                                                                                                                                           |
| bba_J27001 | FRT                               | FLP recombinase recognition site, <i>Saccharomyces cerevisiae</i> (32)                                                                                                                                                                   |
| bba_J72082 | rbs. <i>coi</i>                   | Repressor inactivator, Bacteriophage P1 (6)                                                                                                                                                                                              |
| bba_J72083 | rbs. <i>pacA</i>                  | DNA packaging enzyme subunit and DNA packaging sites, Bacteriophage P1 (6)                                                                                                                                                               |
| bba_J72084 | rbs.mRFP1                         | Monomeric red fluorescent protein derivative (33)                                                                                                                                                                                        |
| bba_J72085 | rbs. <i>repL</i>                  | Initiates lytic replication, Bacteriophage P1 (6)                                                                                                                                                                                        |
| bba_J72046 | rbs.GFP.double terminator         | BglBrick standard version of (BBa_E0040 joined with BBa_B0015)                                                                                                                                                                           |
| bba_J72086 | rbs. <i>pir</i>                   | Factor required for replication of gamma origin of <i>E. coli</i> plasmid R6K (34)                                                                                                                                                       |
| bba_J72087 | rbs. <i>lacZ</i>                  | Beta-galactosidase from <i>E. coli</i> MG1655                                                                                                                                                                                            |
| bba_J72088 | rbsC.ColE2 <i>repA</i>            | Replication initiator of <i>E. coli/Shigella</i> plasmid ColE2-P9 (35), used to support replication of vector J72111 (referred to as pBjk2741 in (36))                                                                                   |
| bba_J72089 | rbs. <i>cl</i>                    | Master repressor, Bacteriophage P1 (6)                                                                                                                                                                                                   |
| bba_J72090 | <i>vioABCDE</i>                   | Synthetic (recoded) violacein synthesis operon from <i>Chromobacterium violaceum</i> . BglBrick standard version of BBa_K274002 (see <a href="http://partsregistry.org/Part:BBa_K274002">http://partsregistry.org/Part:BBa_K274002</a> ) |
| bba_J72091 | <i>luxCDABE</i>                   | Luciferase and substrate synthesis operon from <i>Photobacterium luminescens</i> (ATCC 29999) (37)                                                                                                                                       |
| bba_J72092 | kanamycin resistance cassette     |                                                                                                                                                                                                                                          |
| bba_J72048 | rbs.sfGFP                         | Superfolder GFP mutant (38). BglBrick standard version of BBa_I746916 (see <a href="http://partsregistry.org/Part:BBa_I746916">http://partsregistry.org/Part:BBa_I746916</a> )                                                           |

**Table S2 – Composite Parts used in the study**

| Registry # | Description                                                                                             | Composition                                                                  |
|------------|---------------------------------------------------------------------------------------------------------|------------------------------------------------------------------------------|
| bba_J72094 | P <sub>BAD</sub> driven, <i>coi</i> only phagemid                                                       | bba_J72071.bba_J72082.bba_J72049                                             |
| bba_J72095 | P <sub>BAD</sub> driven, <i>coi</i> + <i>repL</i> phagemid                                              | bba_J72071.bba_J72082.bba_J72049.bba_J72080                                  |
| bba_J72096 | P <sub>BAD</sub> driven, <i>coi</i> + <i>repL</i> + <i>pacA</i> phagemid                                | bba_J72071.bba_J72082.bba_J72049.bba_J72080.bba_J72076.bba_J72083.bba_J72085 |
| bba_J72097 | P <sub>RHA</sub> driven, <i>coi</i> only phagemid                                                       | bba_J72072.bba_J72082.bba_J72049                                             |
| bba_J72098 | Constitutively expressed <i>cl</i>                                                                      | bba_J72075.bba_J72089                                                        |
| bba_J72099 | P <sub>BAD</sub> driven, <i>coi</i> + <i>repL</i> + <i>pacA</i> phagemid for library fragment insertion | bba_J72071.bba_J72082.bba_J72049.bba_J72076.bba_J72083.bba_J72085            |
| bba_J72100 | Constitutively expressed <i>lacZ</i>                                                                    | bba_J72074.bba_J72087                                                        |

|            |                                                                                                      |                                                                                                                          |
|------------|------------------------------------------------------------------------------------------------------|--------------------------------------------------------------------------------------------------------------------------|
| bba_J72101 | P <sub>BAD</sub> driven, <i>coi</i> + <i>pacA</i> phagemid                                           | bba_J72071.bba_J72082.bba_J72049.bba_J72076.bba_J72083.bba_J72077                                                        |
| bba_J72102 | P <sub>BAD</sub> driven, <i>coi</i> + <i>cin</i> phagemid                                            | bba_J72071.bba_J72082.bba_J72049.bba_J72079                                                                              |
| bba_J72115 | P <sub>BAD</sub> driven, <i>coi</i> + <i>cin</i> + <i>repL</i> phagemid                              | bba_J72071.bba_J72082.bba_J72049.bba_J72079.bba_J72080                                                                   |
| bba_J72116 | P <sub>BAD</sub> driven, <i>coi</i> + <i>cin</i> + <i>pacA</i> phagemid                              | bba_J72071.bba_J72082.bba_J72049.bba_J72079.bba_J72076.bba_J72083.bba_J72077                                             |
| bba_J72103 | P <sub>BAD</sub> driven, <i>coi</i> + <i>repL</i> + <i>cin</i> + <i>pacA</i> phagemid                | bba_J72071.bba_J72082.bba_J72049.bba_J72079.bba_J72080.bba_J72076.bba_J72083.bba_J72077                                  |
| bba_J72104 | P <sub>RHA</sub> driven <i>lux</i> + <i>vio</i> operons, constitutive <i>lacZ</i> expression         | bba_J72072.bba_J72091.bba_J72090.bba_J72049.bba_J72074.bba_J72087                                                        |
| bba_J72105 | Competitor phagemid; <i>cin</i> + <i>repL</i> + <i>pacA</i>                                          | bba_J72079.bba_J72080.bba_J72083                                                                                         |
| bba_J72106 | P <sub>BAD</sub> driven, <i>coi</i> + RFP phagemid                                                   | bba_J72071.bba_J72082.bba_J72049.bba_J72005.bba_J72084.bba_J72049                                                        |
| bba_J72107 | Reference promoter driving expression of GFP                                                         | bba_J72047.bba_J72046                                                                                                    |
| bba_J72108 | P <sub>BAD</sub> driven GFP                                                                          | bba_J72071.bba_J72046                                                                                                    |
| bba_J72152 | P <sub>BAD</sub> driven, <i>coi</i> + <i>repL</i> + <i>cin</i> + <i>pacA</i> phagemid expressing GFP | bba_J72071.bba_J72082.bba_J72049.bba_J72079.bba_J72080.bba_J72076.bba_J72083.bba_J72077.bba_J72005.bba_J72048.bba_J72049 |
| bba_J72155 | GFP expression cassette                                                                              | bba_J72005.bba_J72048.bba_J72049                                                                                         |

**Table S3 – Vectors used in the study**

| Registry # | Description                                                                    |
|------------|--------------------------------------------------------------------------------|
| bba_J72109 | ampicillin resistant pUC vector                                                |
| bba_J72110 | ampicillin + chloramphenicol resistant p15A vector                             |
| bba_J72153 | ampicillin + kanamycin resistant p15A vector                                   |
| bba_J72154 | kanamycin + chloramphenicol resistant p15A vector                              |
| bba_J72111 | spectinomycin resistant split ColE2 vector                                     |
| bba_J72112 | spectinomycin resistant split R6K vector                                       |
| bba_J72113 | chloramphenicol resistant p15A vector                                          |
| bba_J72114 | complete, arabinose inducible phagemid, chloramphenicol resistant, p15a vector |

**Table S4 – Strains used in the study**

| Registry # | Description                                                                                                                                                                  | Composition                                                                                           | Name in text |
|------------|------------------------------------------------------------------------------------------------------------------------------------------------------------------------------|-------------------------------------------------------------------------------------------------------|--------------|
| BBa_J72136 | MC1061 <i>upp::pir</i> +FRT-kanR-FRT<br>Cassette encoding constitutive expression of <i>pir</i> and kanamycin resistance inserted between <i>purM</i> and <i>uraA</i>        | <i>purM</i> - bba_J72005.bba_J72086.<br>bba_J72001.bba_J72092.<br>bba_J72001 - <i>uraA</i>            | JTK029       |
| BBa_J72137 | MC1061 <i>upp::pir</i> +FRT<br>Cassette encoding constitutive expression of <i>pir</i> inserted between <i>purM</i> and <i>uraA</i>                                          | <i>purM</i> - bba_J72005.bba_J72086.<br>bba_J72001 - <i>uraA</i>                                      | JTK030       |
| BBa_J72138 | MC1061 O16:: <i>repA</i> +FRT<br>Cassette encoding constitutive expression of <i>repA</i> (from ColE2) and kanamycin resistance inserted between <i>galF</i> and <i>wbbL</i> | <i>galF</i> - bba_J72073.bba_J72088.<br>bba_J72049.bba_J72001.<br>bba_J72092.bba_J72001 - <i>wbbL</i> | JTK160C      |

## Supplemental References

30. Guzman, L. M., Belin, D., Carson, M. J., and Beckwith, J. (1995) Tight regulation, modulation, and high-level expression by vectors containing the arabinose PBAD promoter, *J Bacteriol* 177, 4121-4130.
31. Tobin, J. F., and Schleif, R. F. (1987) Positive regulation of the Escherichia coli L-rhamnose operon is mediated by the products of tandemly repeated regulatory genes, *J Mol Biol* 196, 789-799.
32. Babineau, D., Vetter, D., Andrews, B. J., Gronostajski, R. M., Proteau, G. A., Beatty, L. G., and Sadowski, P. D. (1985) The FLP protein of the 2-micron plasmid of yeast. Purification of the protein from Escherichia coli cells expressing the cloned FLP gene, *J Biol Chem* 260, 12313-12319.
33. Shaner, N. C., Campbell, R. E., Steinbach, P. A., Giepmans, B. N., Palmer, A. E., and Tsien, R. Y. (2004) Improved monomeric red, orange and yellow fluorescent proteins derived from Discosoma sp. red fluorescent protein, *Nat Biotechnol* 22, 1567-1572.
34. Metcalf, W. W., Jiang, W., and Wanner, B. L. (1994) Use of the rep technique for allele replacement to construct new Escherichia coli hosts for maintenance of R6K gamma origin plasmids at different copy numbers, *Gene* 138, 1-7.
35. Hiraga, S., Sugiyama, T., and Itoh, T. (1994) Comparative analysis of the replicon regions of eleven ColE2-related plasmids, *J Bacteriol* 176, 7233-7243.
36. Kittleson, J. T., Cheung, S., and Anderson, J. C. (2011) Rapid optimization of gene dosage in E. coli using DIAL strains, *Journal of biological engineering* 5, 10.
37. Winson, M. K., Swift, S., Hill, P. J., Sims, C. M., Griesmayr, G., Bycroft, B. W., Williams, P., and Stewart, G. S. (1998) Engineering the luxCDABE genes from Photobacterium luminescens to provide a bioluminescent reporter for constitutive and promoter probe plasmids and mini-Tn5 constructs, *FEMS Microbiol Lett* 163, 193-202.
38. Pedelacq, J. D., Cabantous, S., Tran, T., Terwilliger, T. C., and Waldo, G. S. (2006) Engineering and characterization of a superfolder green fluorescent protein, *Nat Biotechnol* 24, 79-88.
